# Supplementary material
Source: ML conference proceedings conference paper supplement (https://proceedings.mlr.press/v38/carlson15.html)
Supplement: Supplementary file 1 [file carlson15-supp.pdf]

# Stochastic Spectral Descent for Restricted Boltzmann Machines: Supplemental Material

David Carlson<sup>1</sup>

Volkan Cevher<sup>2</sup>

Lawrence Carin<sup>1</sup>

<sup>1</sup> Department of Electrical and Computer Engineering, Duke University

<sup>2</sup> Laboratory for Information and Inference Systems (LIONS), EPFL

## A Theorem proofs

*Proof.* Proof of Theorem 1.

The Hessian of the  $lse$  function is given by

$$\begin{aligned} \nabla^2 lse_{\boldsymbol{\omega}}(\mathbf{u}) &= \frac{\text{diag}(\boldsymbol{\omega} \odot \exp(\mathbf{u}))}{\boldsymbol{\omega}^T \exp(\mathbf{u})} \\ &- \frac{(\boldsymbol{\omega} \odot \exp(\mathbf{u}))(\boldsymbol{\omega} \odot \exp(\mathbf{u}))^T}{(\boldsymbol{\omega}^T \exp(\mathbf{u}))^2} \end{aligned} \quad (\text{A.1})$$

There are two terms in the Hessian matrix. The first term is

$$\frac{\text{diag}(\boldsymbol{\omega} \odot \exp(\mathbf{u}))}{\boldsymbol{\omega}^T \exp(\mathbf{u})}$$

This is a diagonal matrix where the diagonal entries are nonnegative and sum to one. The second term is

$$-\frac{(\boldsymbol{\omega} \odot \exp(\mathbf{u}))(\boldsymbol{\omega} \odot \exp(\mathbf{u}))^T}{(\boldsymbol{\omega}^T \exp(\mathbf{u}))^2}$$

This term is a rank-one matrix with a negative eigenvalue.

Writing Taylor's theorem:

$$\begin{aligned} lse_{\boldsymbol{\omega}}(\mathbf{v}) &= lse_{\boldsymbol{\omega}}(\mathbf{u}) + \langle \nabla lse_{\boldsymbol{\omega}}(\mathbf{u}), \mathbf{v} - \mathbf{u} \rangle \\ &+ \int_0^1 (1-t)(\mathbf{v} - \mathbf{u})^T \nabla^2 lse_{\boldsymbol{\omega}}(\mathbf{u} + t(\mathbf{v} - \mathbf{u}))(\mathbf{v} - \mathbf{u}) dt \end{aligned}$$

The terms in the integral can be bound

$$\begin{aligned} &(\mathbf{v} - \mathbf{u})^T \nabla^2 lse_{\boldsymbol{\omega}}(\mathbf{u} + t(\mathbf{v} - \mathbf{u}))(\mathbf{v} - \mathbf{u}) \\ &\leq (\mathbf{v} - \mathbf{u}) \frac{\text{diag}(\boldsymbol{\omega} \odot \exp(\mathbf{u} + t(\mathbf{v} - \mathbf{u})))}{\boldsymbol{\omega}^T \exp(\mathbf{u} + t(\mathbf{v} - \mathbf{u}))} (\mathbf{v} - \mathbf{u}) \end{aligned} \quad (\text{A.2})$$

$$\begin{aligned} &= \sum_{j=1}^J \frac{\omega_j \exp(u_j + t(v_j - u_j))}{\boldsymbol{\omega}^T \exp(\mathbf{u} + t(\mathbf{v} - \mathbf{u}))} (v_j - u_j)^2 \\ &\leq \max_{\mathbf{c} \geq 0, \|\mathbf{c}\|_1 = 1} \sum_{j=1}^J c_j (v_j - u_j)^2 \end{aligned} \quad (\text{A.3})$$

$$= \|\mathbf{v} - \mathbf{u}\|_{\infty}^2 \quad (\text{A.4})$$

Eq. A.2 follows because the second term in the Hessian will give a nonpositive value and Eq. A.3 follows because the diagonal entries are nonnegative and sum to 1. The integral has an upper bound of  $\frac{1}{2} \|\mathbf{v} - \mathbf{u}\|_{\infty}^2$ .  $\square$

*Proof.* Proof of Theorem 2.

The log partition function can be written as a sum over only the hidden units to give a similar form to Theorem 1. Define the set  $\{h_i\}_{i=1}^{2^J}$  as the set of unique binary vectors  $\{0, 1\}^J$ , and let  $\mathbf{H} \in \{0, 1\}^{J \times 2^J}$  be the matrix form of this set.

$$f(\boldsymbol{\theta}) = \log \sum_{i=1}^{2^J} \omega_i \exp(\mathbf{h}_i^T \mathbf{b}) \quad (\text{A.5})$$

$$\omega_i = \sum_{m=1}^M \log(1 + \exp(\mathbf{W}_{m, \cdot} \mathbf{h}_i + c_m)) \quad (\text{A.6})$$

Equation A.5 can be equivalently written as

$$f(\boldsymbol{\theta}) = \log \boldsymbol{\omega}^T \exp(\mathbf{H}^T \mathbf{b}) \quad (\text{A.7})$$

with  $\boldsymbol{\omega}$  not dependent on  $\mathbf{b}$ . Plugging into Equation 17,

$$\begin{aligned} f(\{\mathbf{b}, \mathbf{c}^k, \mathbf{W}^k\}) &\leq f(\boldsymbol{\theta}^k) \\ &+ \langle \nabla_{\mathbf{H}^T \mathbf{b}} lse_{\boldsymbol{\omega}}(\mathbf{H}^T \mathbf{b}^k), \mathbf{H}^T (\mathbf{b} - \mathbf{b}^k) \rangle \\ &+ \frac{1}{2} \|\mathbf{H}^T (\mathbf{b} - \mathbf{b}^k)\|_{\infty}^2 \end{aligned} \quad (\text{A.8})$$

To rewrite the inner product term, note that

$$\begin{aligned} \nabla_{\mathbf{H}^T \mathbf{b}} lse_{\boldsymbol{\omega}}(\mathbf{H}^T \mathbf{b}^k) &= \mathbf{H}^T \nabla_{\mathbf{b}} f(\boldsymbol{\theta}^k) \quad (\text{A.9}) \\ (\nabla_{\mathbf{H}^T \mathbf{b}} lse_{\boldsymbol{\omega}}(\mathbf{H}^T \mathbf{b}^k))^T \mathbf{H} (\mathbf{b} - \mathbf{b}^k) &= (\nabla_{\mathbf{b}} f(\boldsymbol{\theta}^k))^T (\mathbf{b} - \mathbf{b}^k) \end{aligned}$$

The bound is simplified as

$$\|\mathbf{H}^T (\mathbf{b} - \mathbf{b}^k)\|_{\infty} = \max_i |h_i^T (\mathbf{b} - \mathbf{b}^k)| \leq J \|\mathbf{b} - \mathbf{b}^k\|_{\infty}$$

Alternatively, this could be bound as

$$\|\mathbf{H}^T (\mathbf{b} - \mathbf{b}^k)\|_{\infty} \leq \sqrt{J} \|\mathbf{b} - \mathbf{b}^k\|_2 \quad (\text{A.10})$$

$$\|\mathbf{H}^T (\mathbf{b} - \mathbf{b}^k)\|_{\infty} \leq \|\mathbf{b} - \mathbf{b}^k\|_1 \quad (\text{A.11})$$

The proof on  $\mathbf{c}$  follows with the same techniques.  $\square$

*Proof.* Proof of Theorem 3.

As in the proof for Theorem 2, let  $\mathbf{H} \in \{0, 1\}^{J \times 2^J}$

and  $\mathbf{V} \in \{0, 1\}^{M \times 2^M}$ , where each column is an unique binary vector. Define  $\mathbf{U} = \mathbf{V}^T \mathbf{W} \mathbf{H}$  and  $\Omega_{ij} = \mathbf{v}_i^T \mathbf{c} + \mathbf{h}_j^T \mathbf{b}$ . Let  $\mathbf{u} = \text{vec}(\mathbf{U})$  and  $\boldsymbol{\omega} = \text{vec}(\Omega)$ . The log partition function is equivalently written

$$f(\boldsymbol{\theta}) = \log \sum_{i=1}^{2^M} \sum_{j=1}^{2^J} \Omega_{ij} \exp \mathbf{U}_{ij} \quad (\text{A.12})$$

$$f(\boldsymbol{\theta}) = \log (\boldsymbol{\omega}^T \exp \mathbf{u}) \quad (\text{A.13})$$

Plugging this form into Equation 17:

$$\begin{aligned} lse_{\boldsymbol{\omega}}(\mathbf{u}) &\geq lse_{\boldsymbol{\omega}}(\mathbf{u}^k) + \langle \nabla_{\mathbf{u}} lse_{\boldsymbol{\omega}}(\mathbf{u}^k), \mathbf{u} - \mathbf{u}^k \rangle \\ &\quad + \frac{1}{2} \|\text{vec}(\mathbf{U} - \mathbf{U}^k)\|_{\infty}^2 \end{aligned} \quad (\text{A.14})$$

Note that

$$\begin{aligned} \langle \nabla_{\mathbf{u}} lse_{\boldsymbol{\omega}}(\mathbf{u}), \mathbf{u} - \mathbf{u}^k \rangle &= \text{tr}((\nabla_{\mathbf{U}} lse_{\Omega}(\mathbf{U}))^T (\mathbf{U} - \mathbf{U}^k)) \\ \nabla_{\mathbf{U}} lse_{\Omega}(\mathbf{U}) \mathbf{H}^T &= \nabla_{\mathbf{W}} f(\boldsymbol{\theta}) \end{aligned} \quad (\text{A.15})$$

Writing the inner product in terms of  $\mathbf{W}$  gives

$$\text{tr}((\nabla_{\mathbf{U}} lse_{\Omega}(\mathbf{U}))^T (\mathbf{U} - \mathbf{U}^k)) = \text{tr}((\nabla_{\mathbf{W}})^T (\mathbf{W} - \mathbf{W}^k)) \quad (\text{A.16})$$

The bound is simplified:

$$\begin{aligned} \|\text{vec}(\mathbf{U} - \mathbf{U}^k)\|_{\infty} &= \max_{i,j} |\mathbf{v}_i^T (\mathbf{W} - \mathbf{W}^k) \mathbf{h}_j| \\ &\leq \sqrt{MJ} \|\mathbf{W} - \mathbf{W}^k\|_{S^{\infty}} \end{aligned} \quad (\text{A.17})$$

Combining these two elements proves Theorem 3.  $\square$

## B Derivation of optimal steps

*Proof.* Proof of  $\mathbf{b}^*$  in Equation 25.

We want to find the minimizer of

$$\min_{\mathbf{b}} \langle \nabla_{\mathbf{b}} F(\boldsymbol{\theta}^k), \mathbf{b} - \mathbf{b}^k \rangle + \frac{J}{2} \|\mathbf{b} - \mathbf{b}^k\|_{\infty}^2$$

First, add an additional variable  $a$  such that the minimizer of the expanded problem is the same as the original problem

$$= \min_{\mathbf{b}, a, |b_j| \leq a, a \geq 0} \langle \nabla_{\mathbf{b}} F(\boldsymbol{\theta}^k), \mathbf{b} - \mathbf{b}^k \rangle + \frac{J}{2} a^2 \quad (\text{B.1})$$

This is straightforward to solve:

$$= \min_{a, a \geq 0} \langle \nabla_{\mathbf{b}} F(\boldsymbol{\theta}^k), -a \times \text{sign}(\nabla_{\mathbf{b}} F(\boldsymbol{\theta}^k)) \rangle + \frac{J}{2} a^2$$

$$a^* = \frac{1}{J} \|\nabla_{\mathbf{b}} F(\boldsymbol{\theta}^k)\|_1 \quad (\text{B.2})$$

$$\mathbf{b}^* = \mathbf{b} - \frac{1}{J} \|\nabla_{\mathbf{b}} F(\boldsymbol{\theta}^k)\|_1 \times \text{sign}(\nabla_{\mathbf{b}} F(\boldsymbol{\theta}^k)) \quad (\text{B.3})$$

$\square$

*Proof.* Proof of  $\mathbf{W}^*$  in Equation 28.

Let  $\mathbf{D} = \mathbf{W} - \mathbf{W}^k$ , and decompose  $\mathbf{D} = \mathbf{A} \mathbf{R} \mathbf{B}^T$ , with  $\mathbf{A}$  and  $\mathbf{B}$  denoting the left and right singular vectors of  $\nabla_{\mathbf{W}} F(\boldsymbol{\theta}^k)$ . Then we want to minimize the quantity

$$\min_{\mathbf{D}} \text{tr}(\nabla_{\mathbf{W}} F(\boldsymbol{\theta}^k) \mathbf{D}) + \frac{MJ}{2} \|\mathbf{D}\|_{S^{\infty}}^2$$

As in the proof on the biases, add an additional variable that will give the same minimizer and solve for the solution.

$$\begin{aligned} &= \min_{\mathbf{D}, a, \|\mathbf{D}\|_{S^{\infty}} < a} \text{tr}(\nabla_{\mathbf{W}} F(\boldsymbol{\theta}^k) \mathbf{D}) + \frac{MJ}{2} a^2 \\ &= \min_{\mathbf{D}, a, \|\mathbf{D}\|_{S^{\infty}} < a} \text{tr}(\nabla_{\mathbf{W}} F(\boldsymbol{\theta}^k) \mathbf{D}) + \frac{MJ}{2} a^2 \\ &= \min_{a, \mathbf{F}, \|\mathbf{F}\|_{S^{\infty}} < a} \boldsymbol{\lambda}^T \text{diag}(\mathbf{R}) + \frac{MJ}{2} a^2 \end{aligned}$$

Letting  $\mathbf{I}_M$  denote the  $M$ -dimensional identity matrix, this gives:

$$\mathbf{R}^* = \frac{-a}{MJ} \mathbf{I}_M \quad (\text{B.4})$$

$$a = \|\boldsymbol{\lambda}\|_1 \quad (\text{B.5})$$

$$\mathbf{R}^* = \left( \frac{-1}{MJ} \|\boldsymbol{\lambda}\|_1 \times \mathbf{I}_M \right) \quad (\text{B.6})$$

$\square$

## C Discussion of using $\ell_2$ bound instead of $\ell_{\infty}$ bound on $lse$ function

[Böhning, 1992] introduces a bound on the  $lse$  function

$$\begin{aligned} lse_1(\mathbf{v}) &\leq lse_1(\mathbf{u}) + \langle \nabla_{\mathbf{u}} lse_1(\mathbf{u}), \mathbf{v} - \mathbf{u} \rangle \\ &\quad + \frac{1}{2} (\mathbf{v} - \mathbf{u})^T \mathbf{B} (\mathbf{v} - \mathbf{u}) \end{aligned} \quad (\text{C.1})$$

$$\mathbf{B} = \frac{1}{2} \left[ \mathbf{I}_J - \frac{1}{J} \mathbf{1}_J \mathbf{1}_J^T \right] \quad (\text{C.2})$$

Where  $\mathbf{I}$  is the  $J$ -dimensional identity matrix and  $\mathbf{1}_J$  is a  $J$ -dimensional ones vector. This is trivially extended to use a nonnegative vector  $\boldsymbol{\omega}$  in place of  $\mathbf{1}_J$ . The quadratic term is equivalently written

$$\frac{1}{2} (\mathbf{v} - \mathbf{u})^T \mathbf{B} (\mathbf{v} - \mathbf{u}) = \frac{1}{4} \|\mathbf{v} - \mathbf{u}\|_2^2 - \frac{1}{4} \text{mean}(\mathbf{v} - \mathbf{u})^2 \quad (\text{C.3})$$

Because of the differences of logsumexp functions, the mean term drops out and so this bound gives

$$\begin{aligned} lse_{\boldsymbol{\omega}}(\mathbf{v}) &\leq lse_{\boldsymbol{\omega}}(\mathbf{u}) + \langle \nabla_{\mathbf{u}} lse_{\boldsymbol{\omega}}(\mathbf{u}), \mathbf{v} - \mathbf{u} \rangle \\ &\quad + \frac{1}{2 \times 2} \|\mathbf{v} - \mathbf{u}\|_2^2 \end{aligned} \quad (\text{C.4})$$

Using Equation C.4 instead of Equation 17 in the proofs in Supplemental Section A leads to looser

bounds due to the high-dimensional nature of the observation space. However, it should be noted that it may be possible to bound this more tightly.

First, examining the bound on the matrix  $\mathbf{W}$ ,

$$\frac{1}{4} \|\text{vec}(\mathbf{U} - \mathbf{U}^k)\|_2^2 \quad (\text{C.5})$$

$$= \frac{1}{4} \sum_{i=1}^{2^M} \sum_{j=1}^{2^J} (\mathbf{v}_i^T (\mathbf{W} - \mathbf{W}^k) \mathbf{u}_j)^2 \quad (\text{C.6})$$

$$\leq \frac{1}{4} \sum_{i=1}^{2^M} \sum_{j=1}^{2^J} \mathbf{v}_i^T ((\mathbf{W} - \mathbf{W}^k) \odot (\mathbf{W} - \mathbf{W}^k)) \mathbf{u}_j \quad (\text{C.7})$$

$$\begin{aligned} &= \frac{1}{4} \text{tr}(((\mathbf{W} - \mathbf{W}^k) \odot (\mathbf{W} - \mathbf{W}^k)) \sum_{i=1}^{2^M} \sum_{j=1}^{2^J} \mathbf{h}_j \mathbf{v}_i^T) \\ &= \frac{1}{4} \text{tr}(((\mathbf{W} - \mathbf{W}^k) \odot (\mathbf{W} - \mathbf{W}^k)) (\frac{2^{M+J}}{4} \mathbf{1}_{J \times M})) \\ &= \frac{2^{M+J}}{16} \|\mathbf{W} - \mathbf{W}\|_F^2 \end{aligned} \quad (\text{C.8})$$

For realistic problems sizes of RBMs, the bound that comes out of the logsumexp  $\infty$ -norm bound is exponentially tighter than the bound using logsumexp  $\ell_2$  norm bound.

Similar analysis on the bias terms reveals a bounding term equations

$$\begin{aligned} f(\{\mathbf{b}, \mathbf{c}^k, \mathbf{W}^k\}) &\leq f(\boldsymbol{\theta}^k) + \langle \nabla_{\mathbf{b}} f(\boldsymbol{\theta}^k), \mathbf{b} - \mathbf{b}^k \rangle \\ &\quad + \frac{2^J}{8} \|\mathbf{b} - \mathbf{b}^k\|_\infty^2 \end{aligned} \quad (\text{C.9})$$

$$\begin{aligned} f(\{\mathbf{b}^k, \mathbf{c}, \mathbf{W}^k\}) &\leq f(\boldsymbol{\theta}^k) + \langle \nabla_{\mathbf{c}} f(\boldsymbol{\theta}^k), \mathbf{c} - \mathbf{c}^k \rangle \\ &\quad + \frac{2^M}{8} \|\mathbf{c} - \mathbf{c}^k\|_\infty^2 \end{aligned} \quad (\text{C.10})$$
